## CORRECTION

# Correction: Different Effects of Hypoxia on Mental Rotation of Normal and Mirrored Letters: Evidence from the Rotation-Related Negativity

Qingguo Ma, Linfeng Hu, Jiaojie Li, Yue Hu, Ling Xia, Xiaojian Chen, Wendong Hu

In the Funding section, the grant number from the funder National Project is listed incorrectly. The correct grant number is: AWS14J011.

## Reference

1. Ma Q, Hu L, Li J, Hu Y, Xia L, Chen X, et al. (2016) Different Effects of Hypoxia on Mental Rotation of Normal and Mirrored Letters: Evidence from the Rotation-Related Negativity. PLoS ONE 11(5): e0154479. <https://doi.org/10.1371/journal.pone.0154479> PMID: 27144444

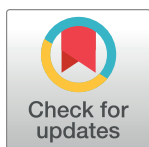

## OPEN ACCESS

**Citation:** Ma Q, Hu L, Li J, Hu Y, Xia L, Chen X, et al. (2019) Correction: Different Effects of Hypoxia on Mental Rotation of Normal and Mirrored Letters: Evidence from the Rotation-Related Negativity. PLoS ONE 14(3): e0213606. <https://doi.org/10.1371/journal.pone.0213606>

**Published:** March 5, 2019

**Copyright:** © 2019 Ma et al. This is an open access article distributed under the terms of the [Creative Commons Attribution License](https://creativecommons.org/licenses/by/4.0/), which permits unrestricted use, distribution, and reproduction in any medium, provided the original author and source are credited.
